# Supplementary material for: Curvature-dependent flexible light emission from layered gallium selenide crystals
Source: Royal Society of Chemistry journal article supplement (doi:10.1039/c7ra11600d), 2018-01-01
Supplement: c7ra11600d1.pdf [file c7ra11600d1.pdf]

## Supplementary Information

### Curvature-dependent flexible light emissions from layered gallium selenide crystals

Ching-An Chuang,<sup>a</sup> Min-Han Lin,<sup>a</sup> Bo-Xian Yeh,<sup>a</sup> and Ching-Hwa Ho<sup>a,b,\*</sup>

<sup>a</sup>*Graduate Institute of Applied Science and Technology, National Taiwan University of Science and Technology, Taipei 106, Taiwan*

<sup>b</sup>*Graduate Institute of Electro-Optical Engineering and Department of Electronic and Computer Engineering, National Taiwan University of Science and Technology, Taipei 106, Taiwan*

\*E-mail: [chho@mail.ntust.edu.tw](mailto:chho@mail.ntust.edu.tw).

## GaSe\_XRD experiment

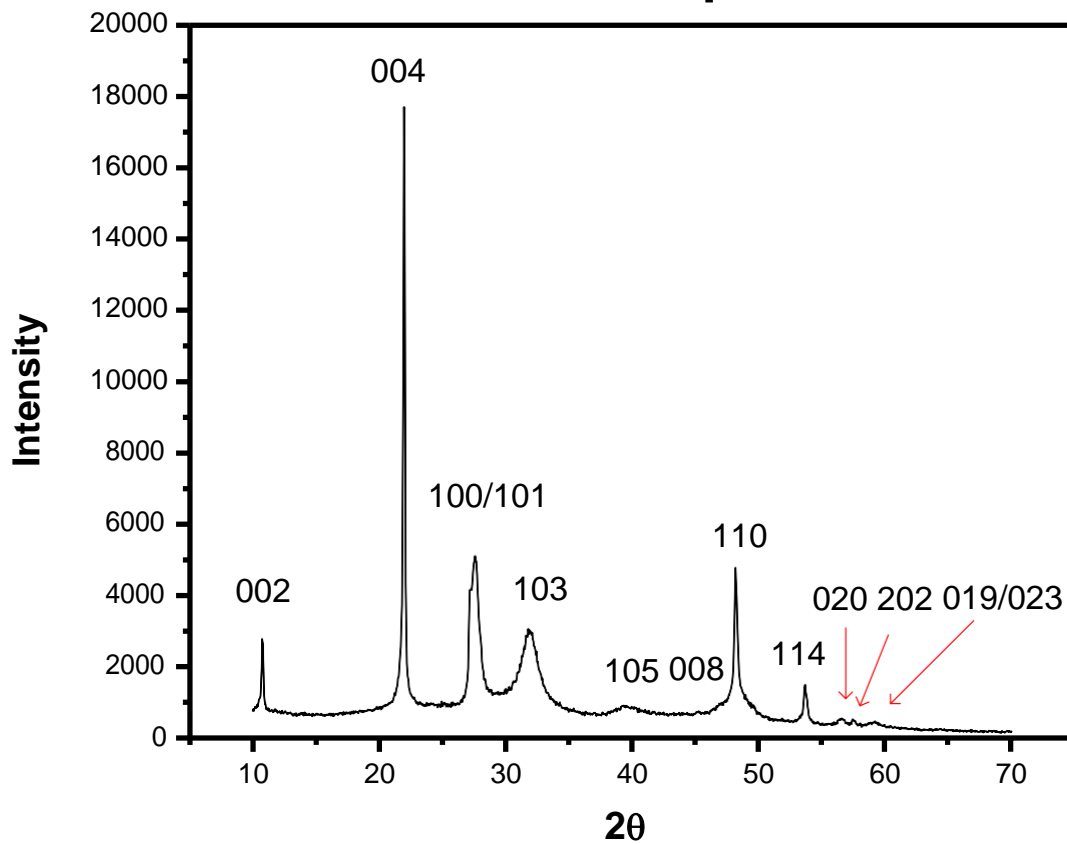

Fig. S1. (a) Powder X-ray diffraction (XRD) pattern of GaSe as-grown crystal. The powdered sample was prepared by finely ground some small crystals of layered GaSe together with quartz powder for grinding. The peak pattern of XRD reveals preferred orientation of the  $c$  plane [e.g. (002) $\approx 10.85^\circ$  and prominent (004) $\approx 22^\circ$ ] to show its two-layer hexagonal (2H) stacking structure. The lattice constants of the 2H GaSe can be calculated using hexagonal system equation [23], and which are determined to be  $a=3.75 \text{ \AA}$  and  $c=15.94 \text{ \AA}$ , respectively.

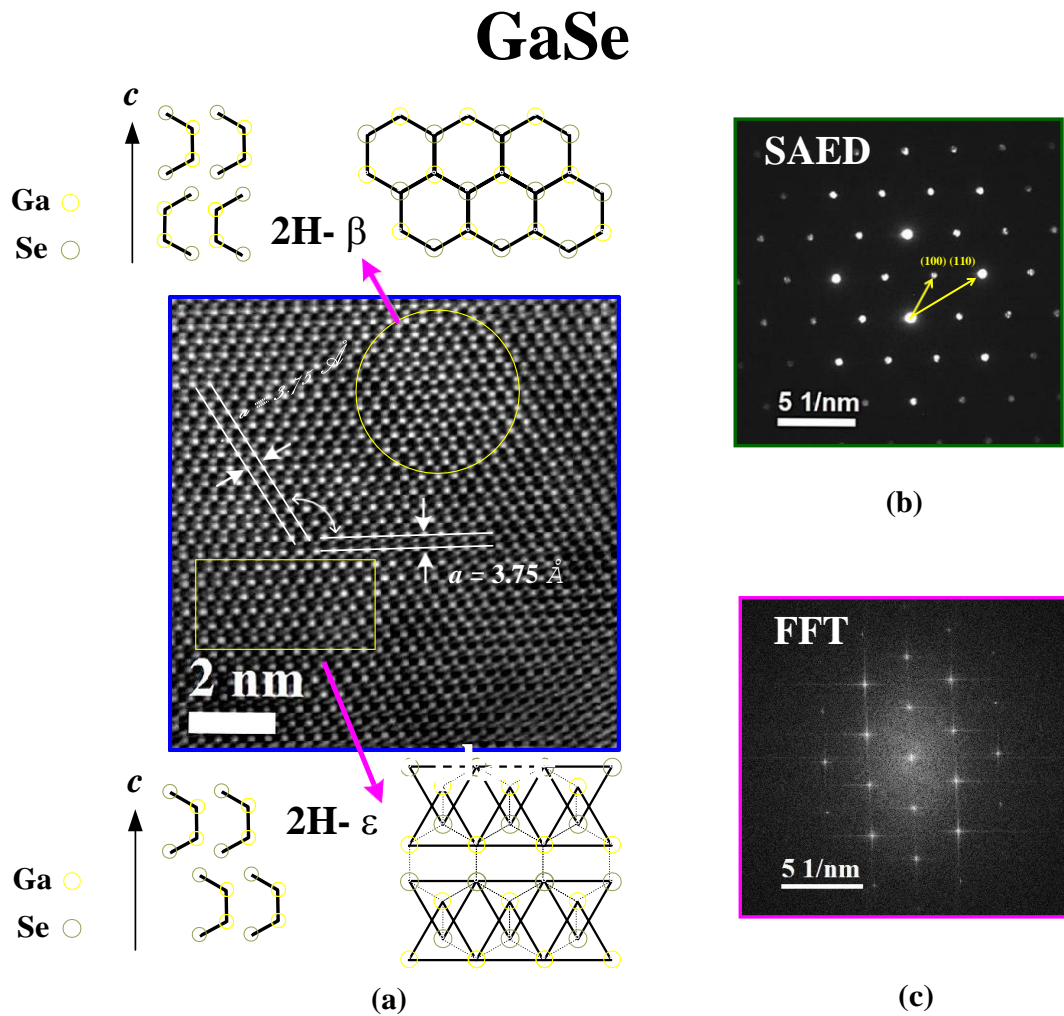

Fig. S2. (a). High-resolution transmission electron microscope (HRTEM) image of the as-grown GaSe few layer. The zone axis is along  $\langle 001 \rangle$  with electron beam impinging on the  $c$  plane. From the scale of the HRTEM image, the  $a$  axis is estimated to be  $3.75 \text{ \AA}$  that matches well with the XRD result. The yellow circle and yellow rectangle respectively show the GaSe may contain two different atomic-stacking arrangements. The top part (circle) may be 2H- $\beta$  stacking phase with the representative scheme shown in upper inset. The lower part (yellow rectangle) shows slightly different atomic arrangement as compared to the upper part. It is maybe coming from the 2H- $\epsilon$  stacking phase. For  $\epsilon$  stacking phase, the Se-Ga-Ga-Se units in the two monolayers' stacking are shifted and misaligned along  $c$  axis for forming the symmetry of  $D_{3h}^1$ . The  $\epsilon$ -GaSe possesses lower bandgap than that of  $\beta$ -GaSe. (b) Selection-area-electron-diffraction (SAED) pattern of GaSe. The dotted spots reveal high crystalline quality and the lattice spacing (100) can be determined to be  $a=3.75 \text{ \AA}$ . (c) Fast-Fourier-Transform (FFT) dotted pattern for the HRTEM measurement.

The result identifies the lattice structure and crystalline quality of the as-grown GaSe.

Supplementary Information Reference:

23. L.V. Azaroff, M. J. Buerger, "The Powder Method in X-ray Crystallography," McGraw-Hill, New York, 1958.
